# Supplementary material for: Synthèse et étude de matériaux nanostructurés à base d'acétate de cellulose pour applications énergétiques
Source: MDPI journal article supplement (doi:10.3390/ma16093368), 2006-12-14
Supplement: s1 [file s1]

## Supplementary Material

### Calculated Raman frequency

In contrast to the of  $\text{Ge}_2\text{Sb}_2\text{Te}_5$  [40],  $\text{GeSb}_4\text{Te}_7$  consists of 12 layers, including a 5-layer  $\text{Sb}_2\text{Te}_3$  module and a 7-layer  $\text{GeSb}_2\text{Te}_4$  module along the c-axis, and thus its Raman vibrational modes can be considered as a superposition of several module vibrational modes. Comparing the calculated Raman vibrational modes of  $\text{Sb}_2\text{Te}_3$  [27],  $\text{Ge}_2\text{Sb}_2\text{Te}_5$  [40],  $\text{MnBi}_2\text{Te}_4$  [28], and  $\text{GeSb}_4\text{Te}_7$ , we found that the frequencies and vibrational modes of the  $E_g(2)$  ( $48.4 \text{ cm}^{-1}$ ),  $A_{1g}(2)$  ( $66.9 \text{ cm}^{-1}$ ),  $E_g(4)$  ( $109.5 \text{ cm}^{-1}$ ), and  $A_{1g}(5)$  ( $167.6 \text{ cm}^{-1}$ ) modes of  $\text{GeSb}_4\text{Te}_7$  correspond to those of the  $E_g(1)$ ,  $A_{1g}(1)$ ,  $E_g(2)$ , and  $A_{1g}(2)$  modes of  $\text{Sb}_2\text{Te}_3$ . The frequencies of the  $E_g(1)$  ( $35.2 \text{ cm}^{-1}$ ),  $A_{1g}(1)$  ( $47.9 \text{ cm}^{-1}$ ),  $E_g(3)$  ( $103.1 \text{ cm}^{-1}$ ), and  $A_{1g}(3)$  ( $113.3 \text{ cm}^{-1}$ ) modes of  $\text{GeSb}_4\text{Te}_7$  match those of the  $E_g(1)$ ,  $A_{1g}(1)$ ,  $E_g(3)$ ,  $A_{1g}(2)$ , and  $A_{1g}(3)$  modes of  $\text{MnBi}_2\text{Te}_4$ , while the  $E_g(5)$  ( $117.2 \text{ cm}^{-1}$ ) and  $A_{1g}(5)$  ( $170.4 \text{ cm}^{-1}$ ) modes of  $\text{GeSb}_4\text{Te}_7$  are similar to the  $E_g(4)$  and  $A_{1g}(4)$  modes of  $\text{Ge}_2\text{Sb}_2\text{Te}_5$ .

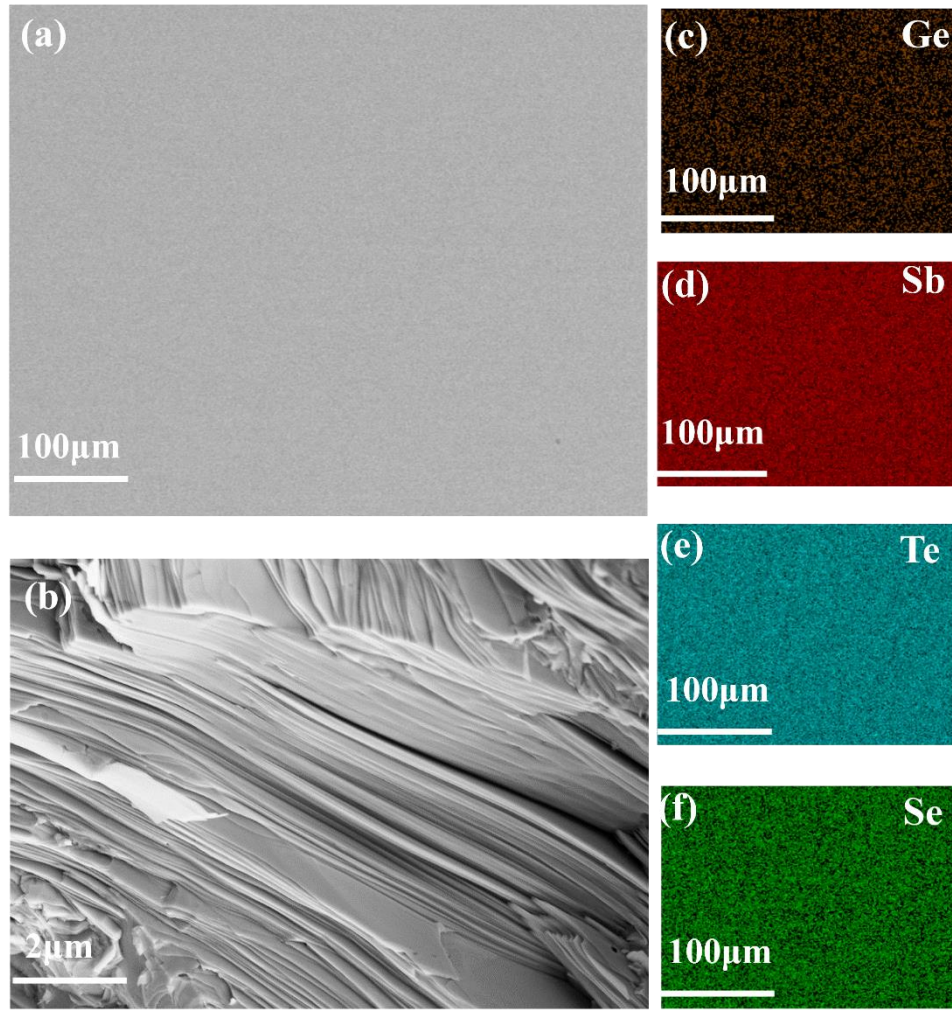

**Figure S1** (a) Backscatter electron (BSE) image, (b) secondary electron (SE2) image of the fractured surface, and energy dispersive spectroscopy (EDS) mappings for (c) Ge, (d) Sb, (e) Te, (f) Se of  $\text{GeSb}_4\text{Te}_5\text{Se}_2$  sample.

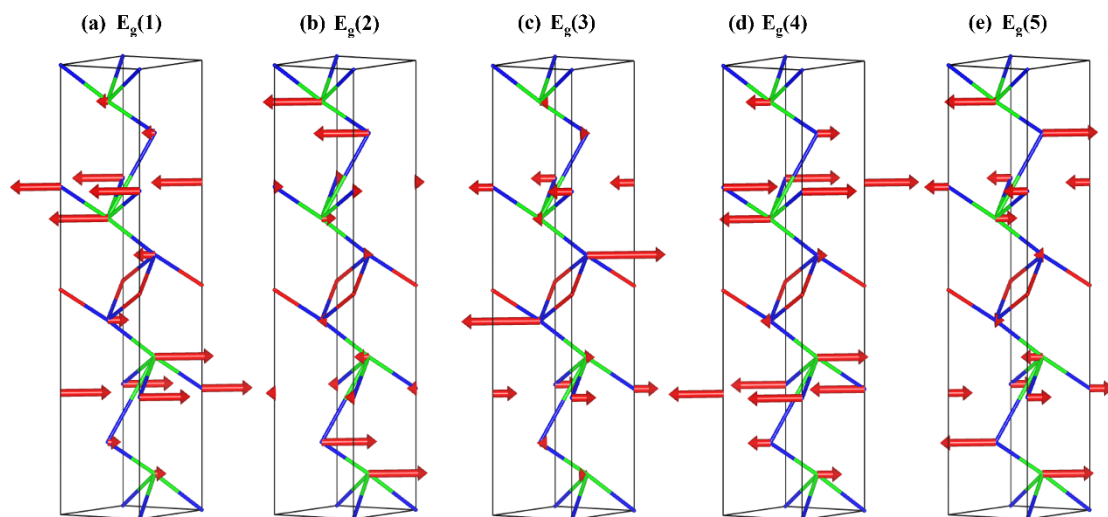

**Figure S2** Sketch of the displacement patterns of Raman-active  $E_g$  phonons at the  $\Gamma$ -point for  $\text{GeSb}_4\text{Te}_7$ . Displacements along the  $c$  axis are involved.

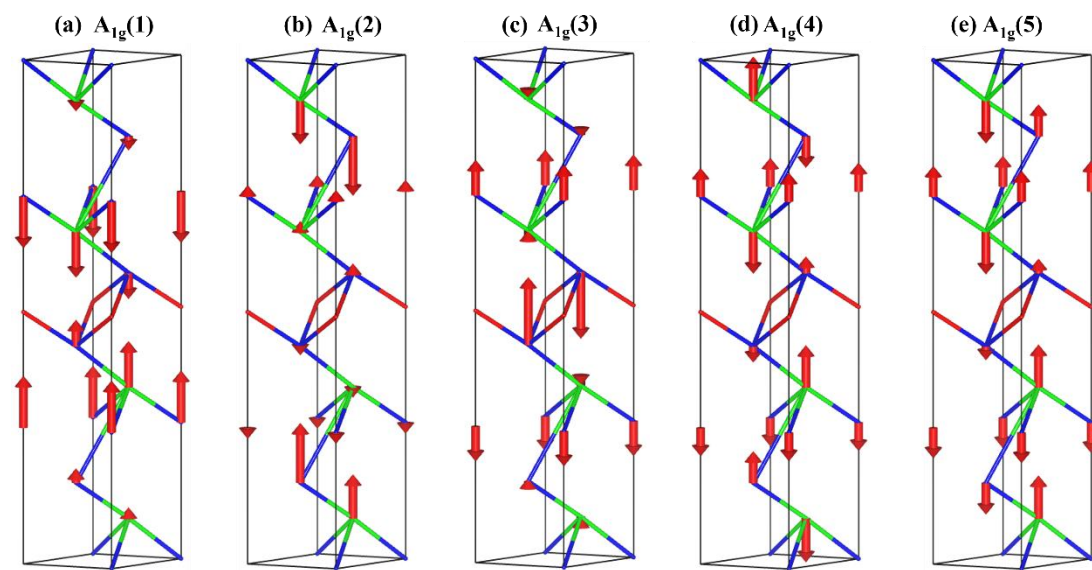

**Figure S3** Sketch of the displacement patterns of Raman-active  $A_{1g}$  phonons at the  $\Gamma$ -point for  $\text{GeSb}_4\text{Te}_7$ . Displacements along the  $c$  axis are involved.

**Tabel S1** Theoretically calculated and measured frequency (cm<sup>-1</sup>) of g-mode (Raman-active) phonons of the  $\Gamma$ -point phonons for optimized geometry GeSb<sub>4</sub>Te<sub>7</sub>.

| Modes               | Calculated (cm <sup>-1</sup> ) | Peak Identity | Measured (cm <sup>-1</sup> ) |
|---------------------|--------------------------------|---------------|------------------------------|
| E <sub>g</sub> (1)  | 35.2                           | -             | -                            |
| A <sub>1g</sub> (1) | 47.9                           | -             | -                            |
| E <sub>g</sub> (2)  | 48.4                           | -             | -                            |
| A <sub>1g</sub> (2) | 66.9                           | A             | 67.6                         |
| E <sub>g</sub> (3)  | 103.1                          | B             | 93.6                         |
| E <sub>g</sub> (4)  | 109.5                          | -             | -                            |
| A <sub>1g</sub> (3) | 113.3                          | C             | 118.3                        |
| E <sub>g</sub> (5)  | 117.2                          | --            | -                            |
| -                   | -                              | D             | 137.9                        |
| A <sub>1g</sub> (4) | 167.6                          | E             | 162.9                        |
| A <sub>1g</sub> (5) | 170.4                          | -             | -                            |

**Tabel S2** Peak identity of Raman spectra of GeSb<sub>4</sub>Te<sub>7</sub>.

| Peak Identity | $\omega$ (cm <sup>-1</sup> ) |                | Intensity |                | FWHM(cm <sup>-1</sup> ) |                |
|---------------|------------------------------|----------------|-----------|----------------|-------------------------|----------------|
|               | value                        | Standard Error | value     | Standard Error | value                   | Standard Error |
| Peak A        | 67.65                        | 0.54           | 3.64      | 0.37           | 14.20                   | 1.20           |
| Peak B        | 93.58                        | 1.02           | 5.64      | 0.79           | 24.71                   | 3.99           |
| Peak C        | 118.27                       | 0.25           | 15.50     | 0.96           | 14.87                   | 0.74           |
| Peak D        | 137.90                       | 0.47           | 8.93      | 0.80           | 17.34                   | 1.45           |
| Peak F        | 162.23                       | 0.83           | 4.10      | 0.42           | 19.04                   | 1.97           |

**Tabel S3** C-peak Raman shifts and linewidths of  $\text{GeSb}_4\text{Te}_{7-x}\text{Se}_x$  with different Se contents.

| Se content $x$ | $\omega(\text{cm}^{-1})$ |          | FWHM( $\text{cm}^{-1}$ ) |          |
|----------------|--------------------------|----------|--------------------------|----------|
|                | value                    | Standard | value                    | Standard |
|                |                          | Error    |                          | Error    |
| <b>0</b>       | 117.09                   | 0.13     | 14.85                    | 0.74     |
| <b>0.1</b>     | 118.26                   | 0.24     | 15.39                    | 0.48     |
| <b>0.2</b>     | 119.30                   | 1.17     | 18.42                    | 4.25     |
| <b>0.3</b>     | 120.42                   | 0.63     | 17.45                    | 2.76     |
| <b>0.5</b>     | 119.18                   | 0.29     | 17.00                    | 1.08     |
| <b>0.8</b>     | 118.07                   | 1.30     | 14.81                    | 2.45     |
| <b>1.5</b>     | 121.29                   | 0.29     | 16.72                    | 0.92     |
| <b>2.0</b>     | 126.04                   | 0.38     | 17.75                    | 0.99     |

**Table S4** Direct band gap of hexagonal  $\text{GeSb}_4\text{Te}_{7-x}\text{Se}_x$  compounds.

| $\text{GeSb}_4\text{Te}_{7-x}\text{Se}_x$ |         |           |           |           |           |           |           |           |
|-------------------------------------------|---------|-----------|-----------|-----------|-----------|-----------|-----------|-----------|
| Se content $x$                            | $x = 0$ | $x = 0.1$ | $x = 0.2$ | $x = 0.3$ | $x = 0.5$ | $x = 0.8$ | $x = 1.5$ | $x = 2.0$ |
| <b><math>E_g</math> (eV)</b>              | 0.72*   | 0.69      | 0.72      | 0.73      | 0.63      | 0.64      | 0.63      | 0.63      |

\* Data from the literature [41]

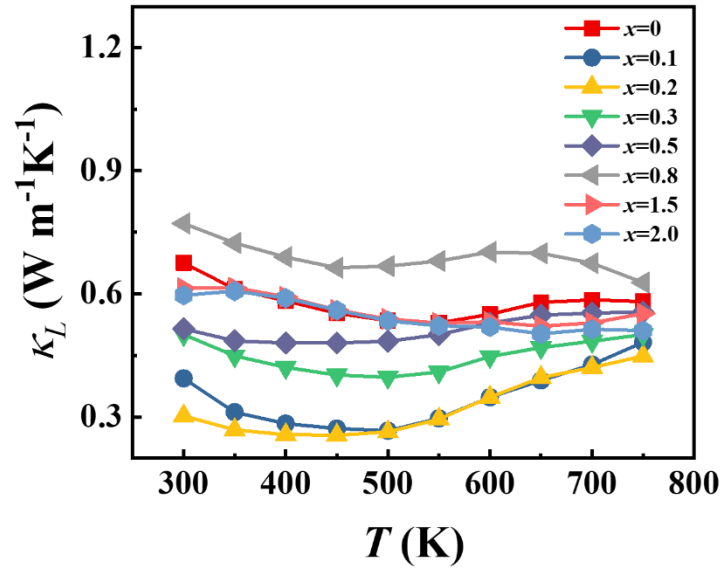

**Figure S4** Temperature dependence of lattice thermal conductivity  $\kappa_L$  for  $\text{GeSb}_4\text{Te}_{7-x}\text{Se}_x$  samples.

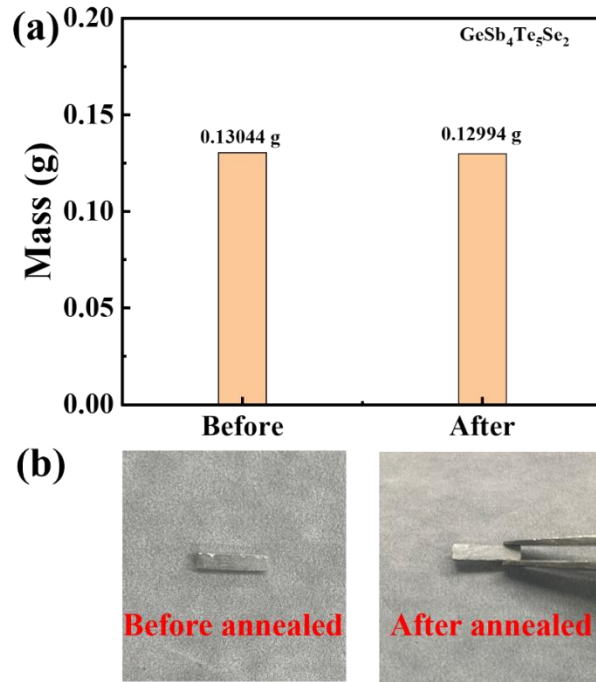

**Figure S5** (a) Mass change and (b) the surface of  $\text{GeSb}_4\text{Te}_5\text{Se}_2$  samples before and after annealing at 750 K.
